# Supplementary material
Source: PubMed Central journal article supplement (PMC7904960)

Figure S1

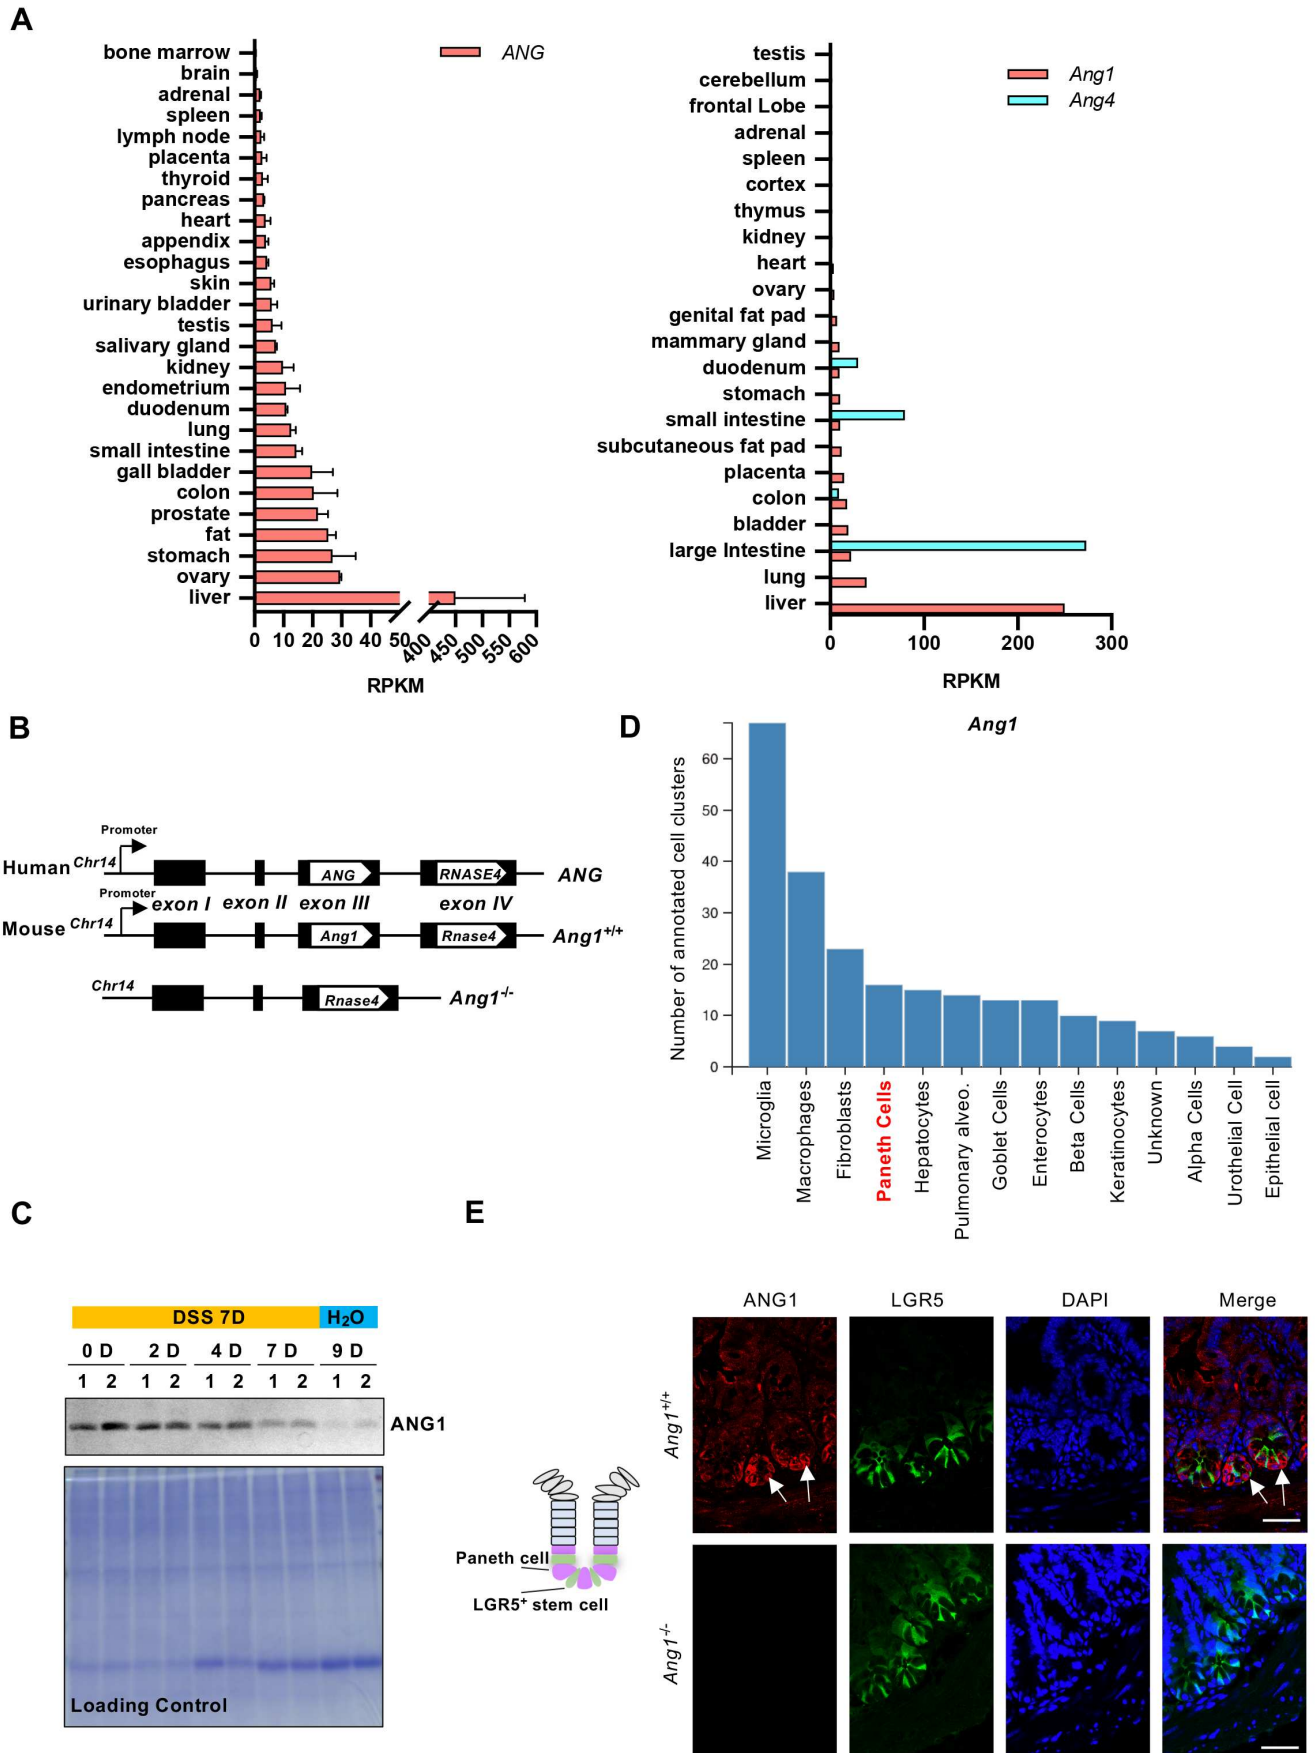

Supplement: NIHMS1630141-supplement-Supplementary_Figure_1.pdf [file NIHMS1630141-supplement-Supplementary_Figure_1.pdf]

Figure S2

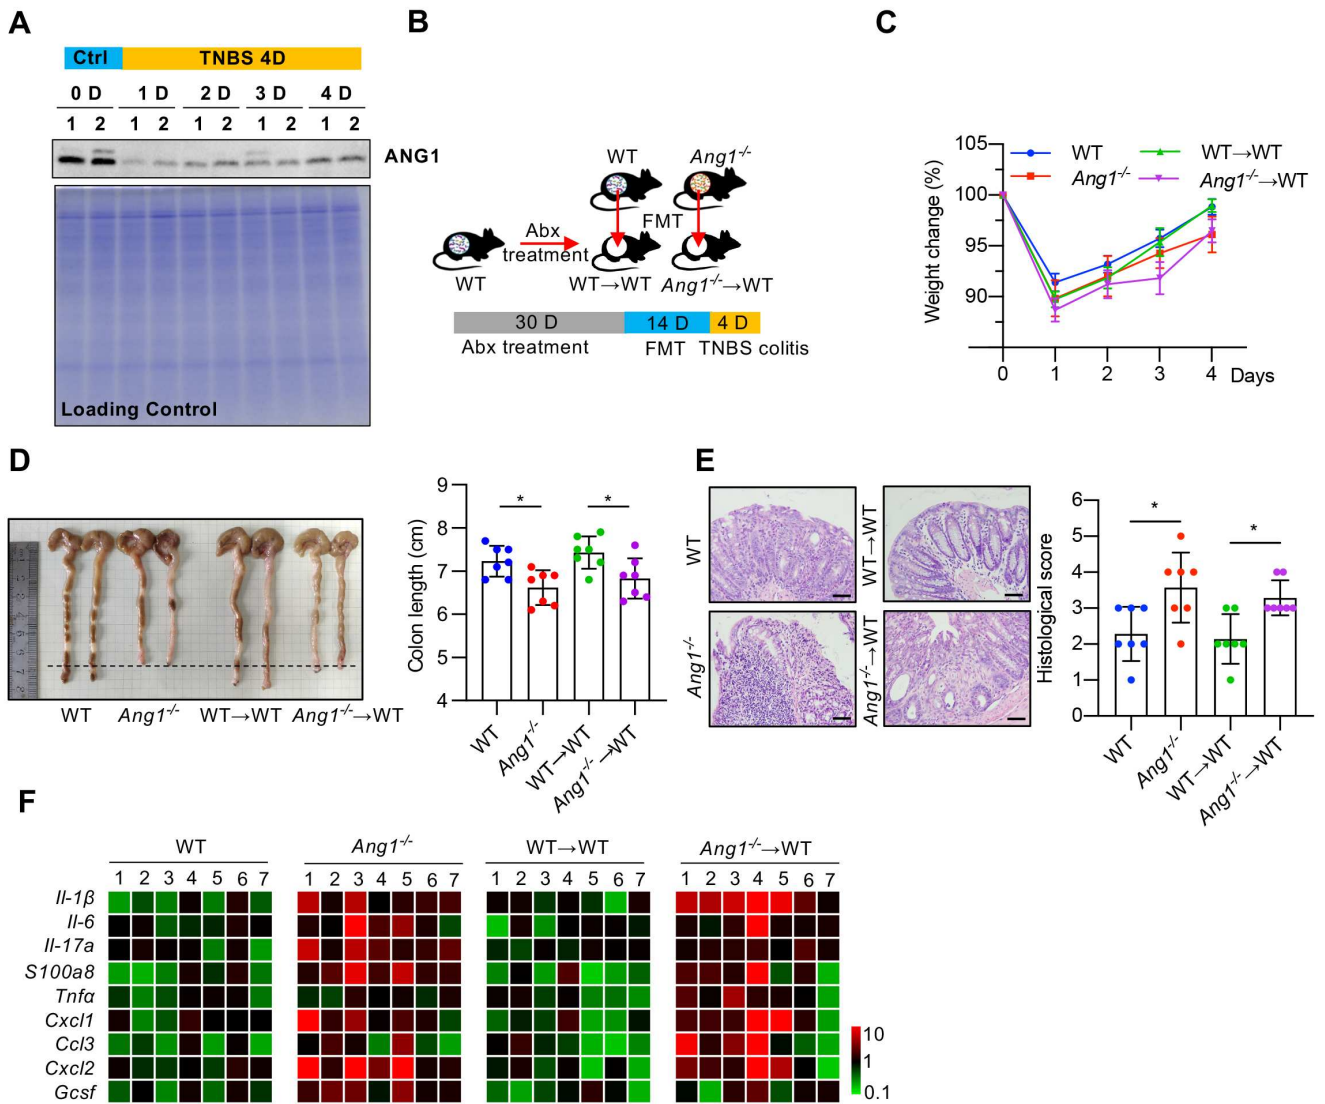

Supplement: NIHMS1630141-supplement-Supplementary_Figure_2.pdf [file NIHMS1630141-supplement-Supplementary_Figure_2.pdf]

Figure S3

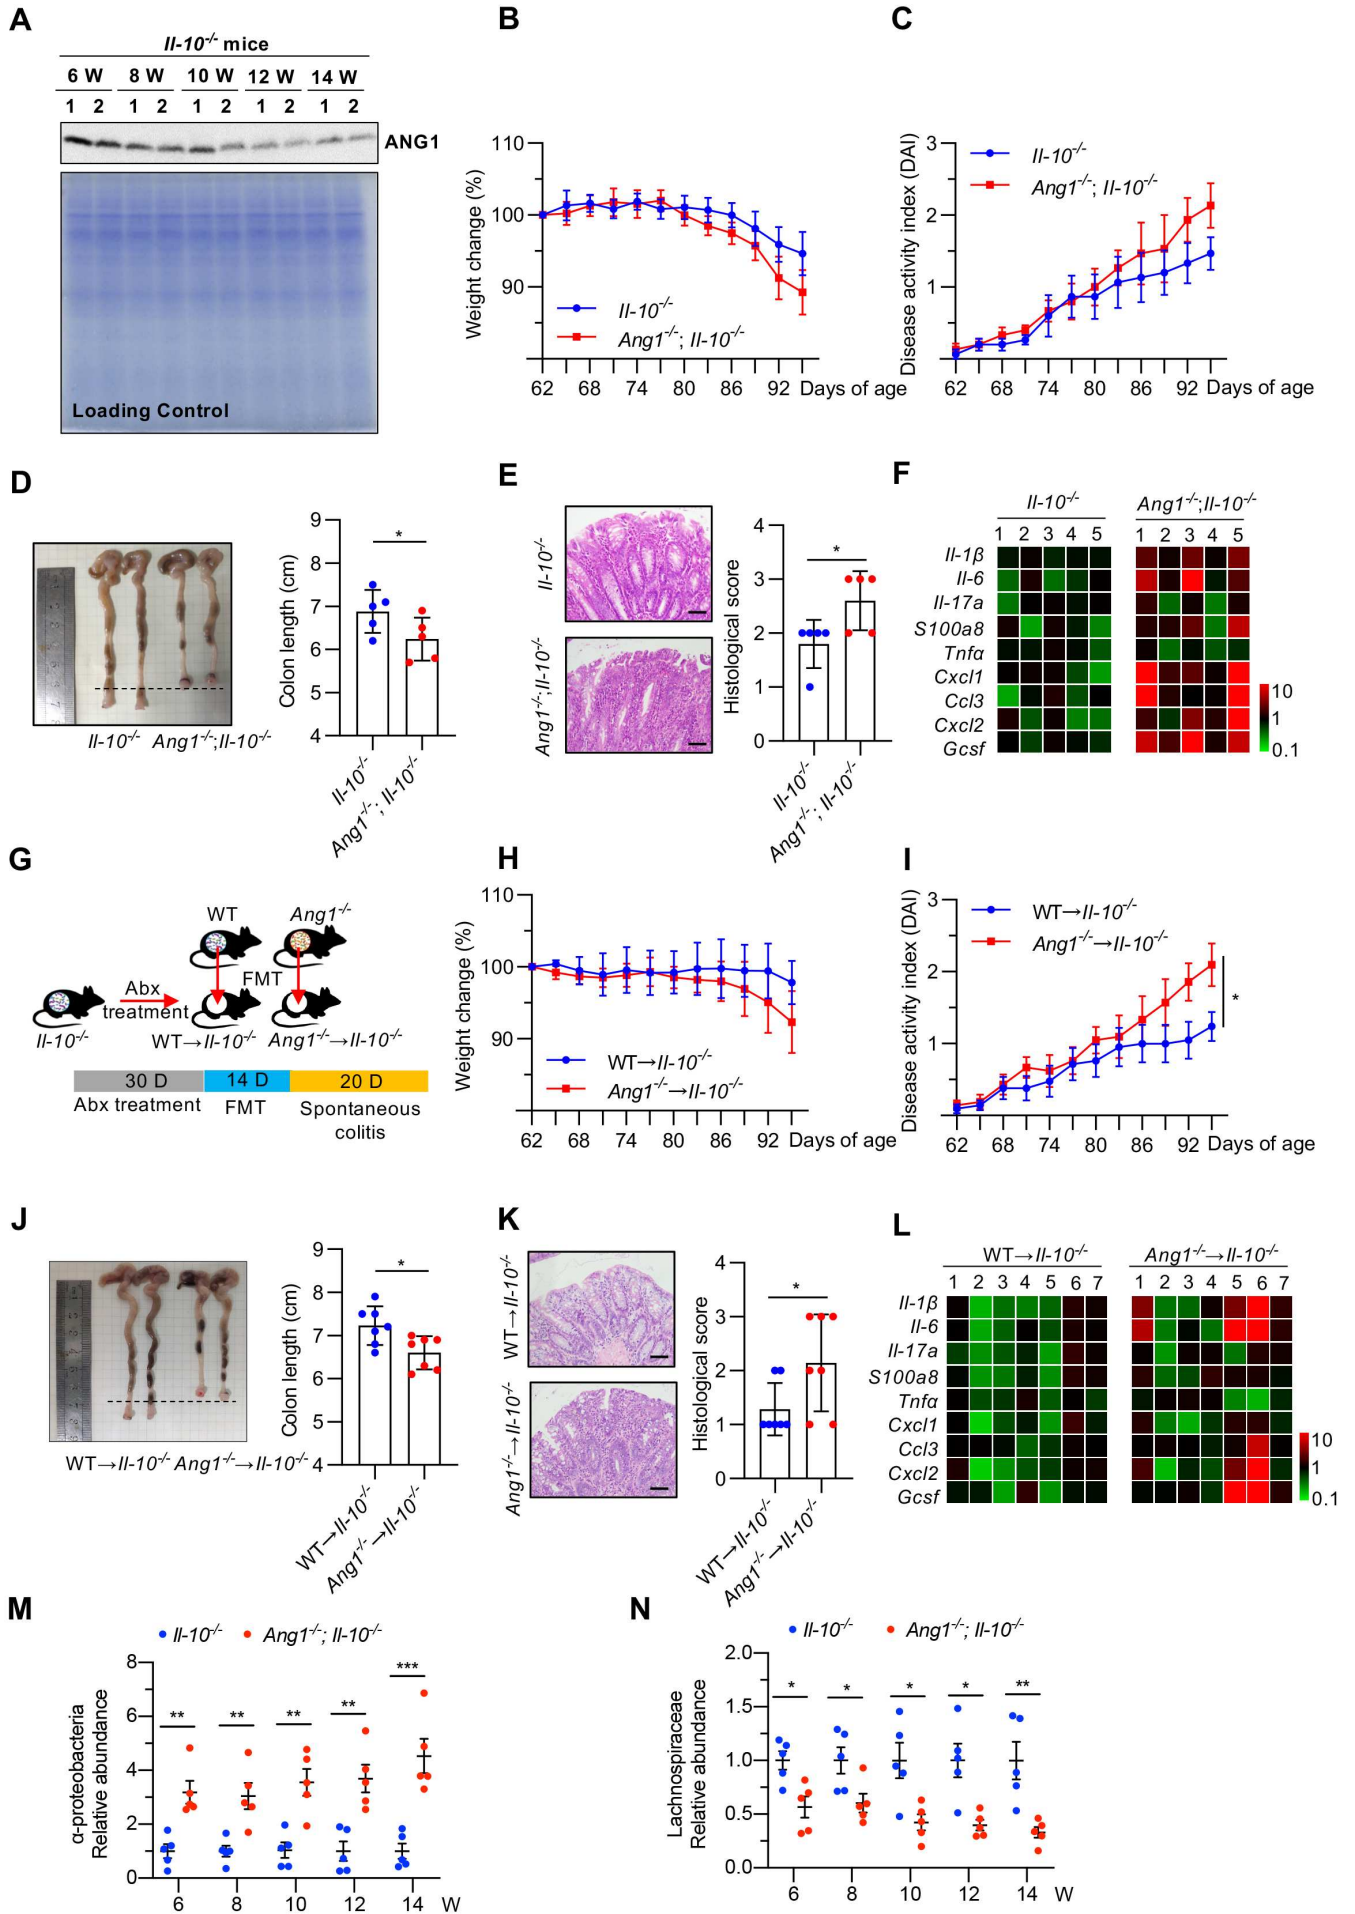

Supplement: NIHMS1630141-supplement-Supplementary_Figure_3.pdf [file NIHMS1630141-supplement-Supplementary_Figure_3.pdf]

Figure S4

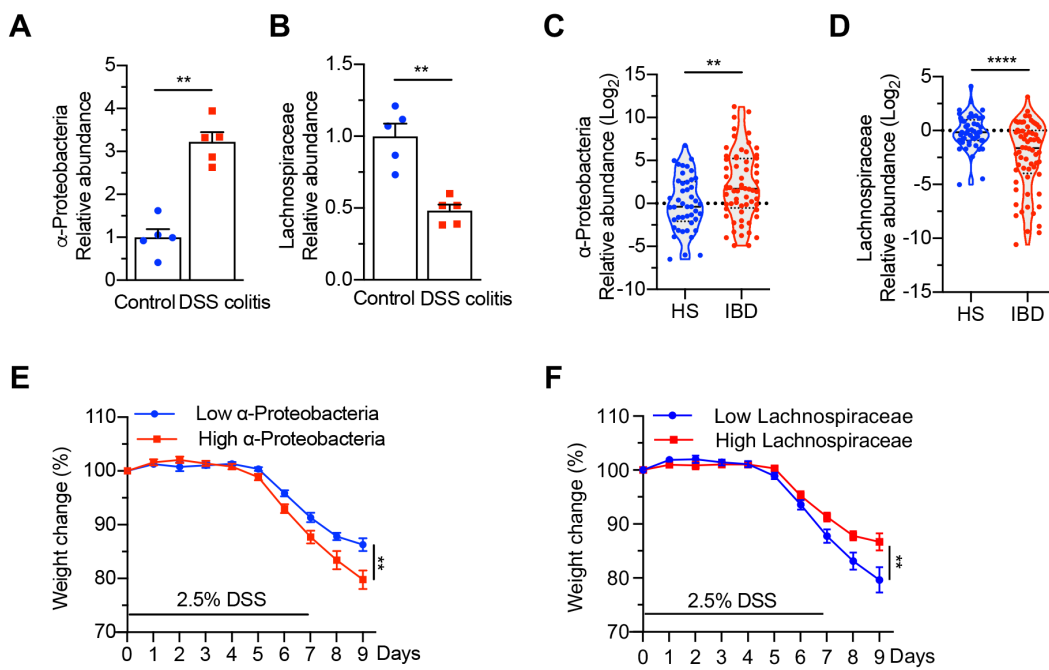

Supplement: NIHMS1630141-supplement-Supplementary_Figure_4.pdf [file NIHMS1630141-supplement-Supplementary_Figure_4.pdf]

Figure S5

A

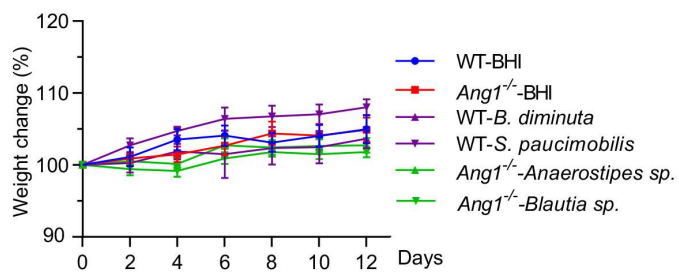

B

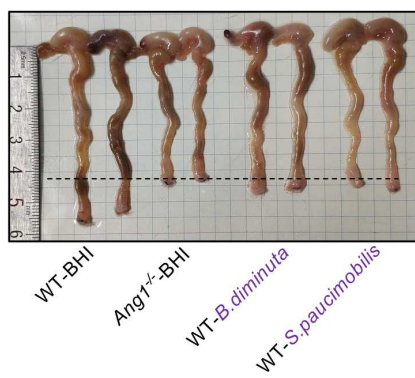

C

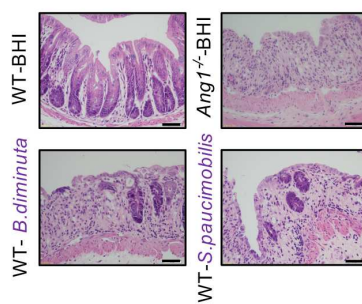

D

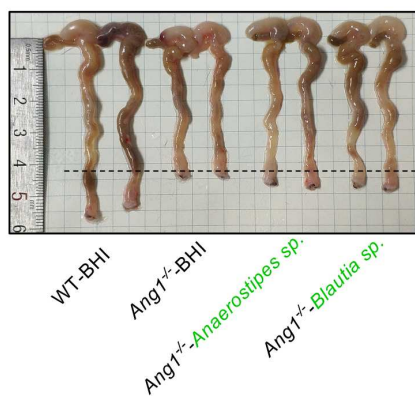

E

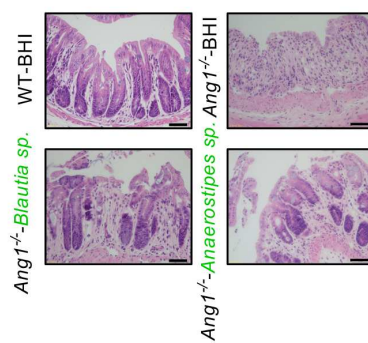

Supplement: NIHMS1630141-supplement-Supplementary_Figure_5.pdf [file NIHMS1630141-supplement-Supplementary_Figure_5.pdf]

**Figure S6****A**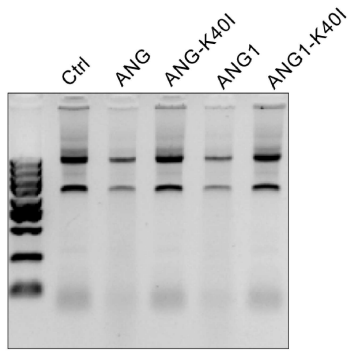**B**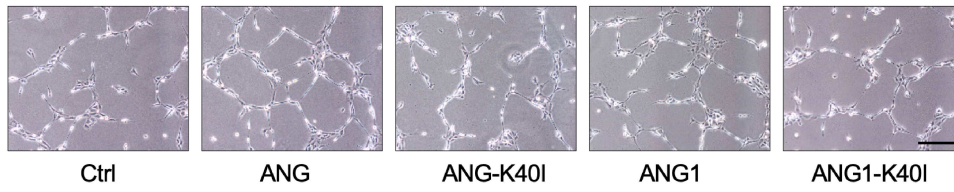

Supplement: NIHMS1630141-supplement-Supplementary_Figure_6.pdf [file NIHMS1630141-supplement-Supplementary_Figure_6.pdf]
